# Supplementary material
Source: Springer Nature journal article supplement (https://www.springermedizin.de/resource/supplementary/13075_2010_3223_MOESM2_ESM.pdf/9693950)

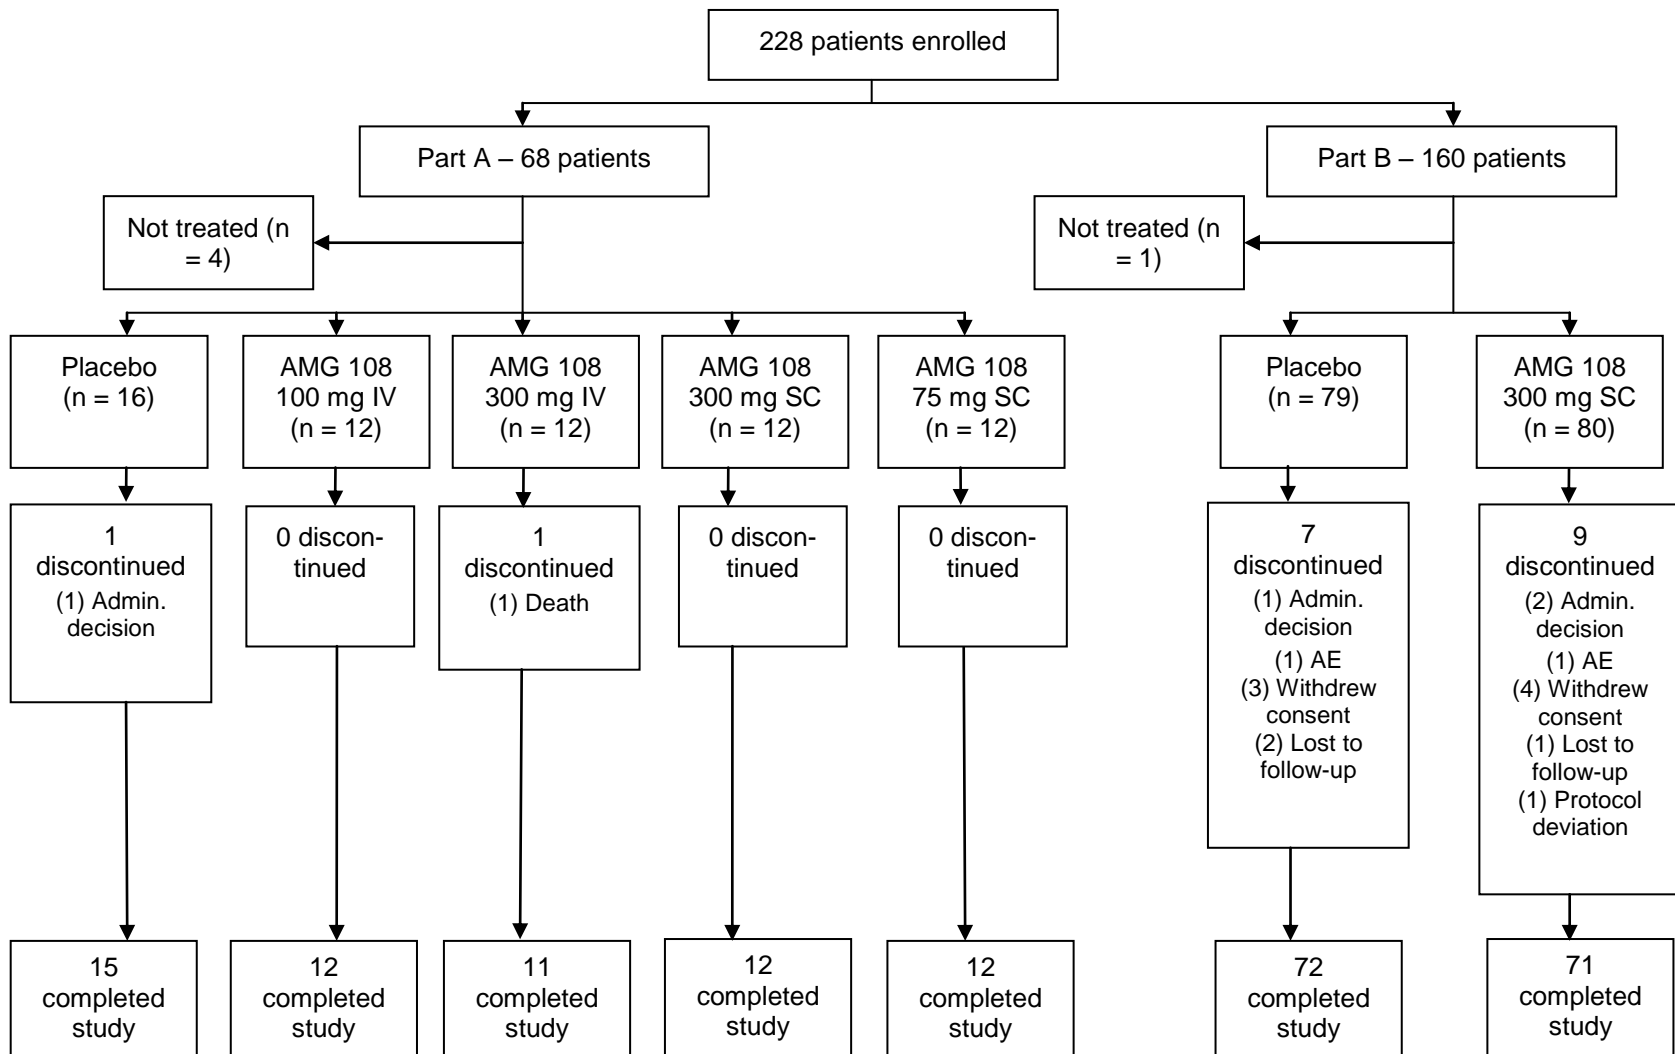

Supplement: MOESM2 [file 9693950]
